# Supplementary material for: Association between hyperemesis gravidarum and psychological symptoms, psychosocial outcomes and infant bonding: a two-point prospective case–control multicentre survey study in an inner city setting
Source: PubMed Central journal article supplement — BMJ Open. 2020 Oct 13;10(10):e039715. doi: 10.1136/bmjopen-2020-039715 (PMC7554497; doi:10.1136/bmjopen-2020-039715), 2020-10-13
Supplement: bmjopen-2020-039715supp001.pdf [file bmjopen-2020-039715supp001.pdf]

**Supplementary Data 1.** Sub-group comparison of EPDS scores in women with HG according to longevity of physical symptoms

|                                                      | Symptoms resolved before 20 weeks<br>n=18 |          | Symptoms resolved >20 weeks or continued throughout pregnancy<br>n=37 |          | OR   | 95% CI      | p value |
|------------------------------------------------------|-------------------------------------------|----------|-----------------------------------------------------------------------|----------|------|-------------|---------|
|                                                      | Mean                                      | SD       | Mean                                                                  | SD       |      |             |         |
| <b>Continuous data EPDS</b>                          |                                           |          |                                                                       |          |      |             |         |
| EPDS at S1                                           | 12.2                                      | 6.4      | 13.2                                                                  | 5.7      | 1.03 | 0.93, 1.13  | 0.554   |
| EPDS at S2                                           | 8.0                                       | 5.5      | 9.7                                                                   | 6.4      | 1.05 | 0.95, 1.16  | 0.326   |
| EPDS difference: survey 1-survey 2                   | 4.2                                       | 6.9      | 3.5                                                                   | 7.8      | 0.99 | 0.91, 1.06  | 0.730   |
| <b>Categorical data EPDS</b>                         | <b>No</b>                                 | <b>%</b> | <b>No</b>                                                             | <b>%</b> |      |             |         |
| <b>Women with EPDS of <math>\geq 13</math> at S1</b> |                                           |          |                                                                       |          |      |             |         |
| No                                                   | 9                                         | 11.4     | 18                                                                    | 22.2     | 1    | .           | .       |
| Yes                                                  | 9                                         | 11.4     | 19                                                                    | 23.5     | 1.06 | 0.34, 3.26  | 0.925   |
| <b>Women with EPDS of <math>\geq 13</math> at S2</b> |                                           |          |                                                                       |          |      |             |         |
| No                                                   | 15                                        | 26.3     | 24                                                                    | 43.6     | 1    | .           | .       |
| Yes                                                  | 3                                         | 5.3      | 13                                                                    | 23.6     | 2.71 | 0.66, 11.11 | 0.166   |
